# Supplementary material for: Changes in Health Behaviours in Adults At-Risk of Chronic Disease: Primary Outcomes From The My Health for Life Program
Source: Research Square preprint supplement (doi:10.21203/rs.3.rs-895190/v1), 2021-09-23

**Supplementary Table 1** Healthy lifestyle index construction

|  | Points per indicator | | | |
| --- | --- | --- | --- | --- |
|  | 3 | 2 | 1 | 0 |
| Body mass index | > 25 kg/m² | 25 - 29.9 kg/m² | 30 – 39.9 kg/m² | ≥ 40 kg/m² |
| Waist circumference a |  | Normal | Increased risk | Greater increased risk |
| Smoking |  | Never | Past smoker | Current smoker |
| Daily fruit intake b |  |  | 2 or more serves | < 2 serves daily |
| Daily vegetable intake b |  |  | 5 or more serves | < 5 serves daily |
| Sugar sweetened drinks |  | Less than weekly | Weekly | Daily/Several times weekly |
| Take-away consumption |  | Less than weekly | Weekly | More than weekly |
| Physical activity c |  | Sufficient for health | Insufficient for health | Sedentary |
| Alcohol quantity d |  | None | 1-4 drinks | ≥ 5 per session |
| Alcohol frequency d |  |  | Daily | Weekly or less |

a Waist circumference (WC) ≥ 94 cm in men and WC ≥ 80 cm in women denoted increased risk and WC ≥ 102 cm in men and WC ≥ 88 cm in women denoted greater increased risk

b Current dietary guidelines recommend a minimum of 2 fruit per day and 5 serves of vegetables [27]

c Physical activity was defined according to the Australian Physical Activity Guidelines [28] denoting the accumulation of at least 150 minutes of activity over one week

d Alcohol consumption was defined according to the Australian Health Survey [29] with ‘risky’ alcohol consumption defines as daily drinking or having more than 4 standard drinks on any one day

**Supplementary Table 2** Associations between participant characteristics and amount of data

|  | Full data | Partial data |
| --- | --- | --- |
|  | n (%) | n (%) |
| Mode |  |  |
| THC | 501 (8.4) | 2,895 (67.2)* |
| GBP | 5,465 (91.6) | 1,414 (32.8) |
| Employment statis |  |  |
| Employed | 2,825 (49.6) | 2,386 (58.5)* |
| Home duties | 300 (5.3) | 192 (4.7) |
| Retired | 1,793 (31.5) | 986 (24.2) |
| Not working | 413 (7.2) | 265 (6.5) |
| Other | 370 (6.5) | 252 (6.2) |
| Gender |  |  |
| Female | 4,557 (76.4) | 3,320 (78.5)* |
| Male | 1,409 (23.6) | 908 (21.5) |
| Age bracket |  |  |
| <45 years | 781 (13.1) | 713 (16.7)* |
| 45 or older | 5,179 (86.9) | 3,568 (83.3) |
| First Nations People |  |  |
| No | 5,728 (96.0) | 4,129 (95.8) |
| Yes | 238 (4.0) | 180 (4.2) |
| Educational attainment |  |  |
| Primary education | 188 (3.2) | 167 (4.0)* |
| Secondary education | 1,888 (32.2) | 1,167 (28.1) |
| Certificate/diploma | 2,145 (36.6) | 1,477 (35.6) |
| Bachelor/postgraduate | 1,535 (26.2) | 1,282 (30.9) |
| Other | 112 (1.9) | 55 (1.3) |
| CALD |  |  |
| No | 5,756 (96.5) | 4,216 (97.8)* |
| Yes | 210 (3.5) | 93 (2.2) |
| IRSAD quintile |  |  |
| Quintile 1 | 685 (11.5) | 702 (16.3)* |
| Quintile 2 | 991 (16.6) | 676 (15.7) |
| Quintile 3 | 1,369 (23.0) | 960 (22.3) |
| Quintile 4 | 1,334 (22.4) | 971 (22.6) |
| Quintile 5 | 1,583 (26.6) | 996 (23.1) |

HLI, Healthy life index (comprising dietary, physical activity, alcohol and smoking, weight indices); THC, Telephone health couching; GBP, Group-based program; CALD, Culturally or Linguistically Diverse

* *p* < .01

**Supplementary Table 3** Proportion of missing data from indicators (including weight) at sessions 1-6 a

|  | Session 1 | Session 5 | Session 6 |
| --- | --- | --- | --- |
| No. missing data points | n (%) | n (%) | n (%) |
| None | 5,966 (58.1) | 3,973 (38.7) | 2,602 (25.3) |
| 1 | 1,172 (11.4) | 983 (9.6) | 569 (5.5) |
| 2 | 2,996 (29.2) | 1,456 (14.2) | 1,764 (17.2) |
| 3 | 123 (1.2) | 186 (1.8) | 136 (1.3) |
| 4 | 17 (0.2) | 107 (1.0) | 375 (3.6) |
| 5 | 1 (0.0) | 11 (0.1) | 2 (0.0) |
| 6 |  | 1 (0.0) | 1 (0.0) |
| 7 |  | 284 (2.8) | 3 (0.0) |
| 8 |  | 178 (1.7) | 158 (1.5) |
| 9 |  | 2,693 (26.2) | 4,194 (40.8) |
| 10 |  | 403 (3.9) | 471 (4.6) |

a Indicators included her include weight, dietary, physical activity, and alcohol and tobacco (range 0-18)

**Supplementary Figure 1** Receiver Operating characteristics curves for predicting missing Session HLI data


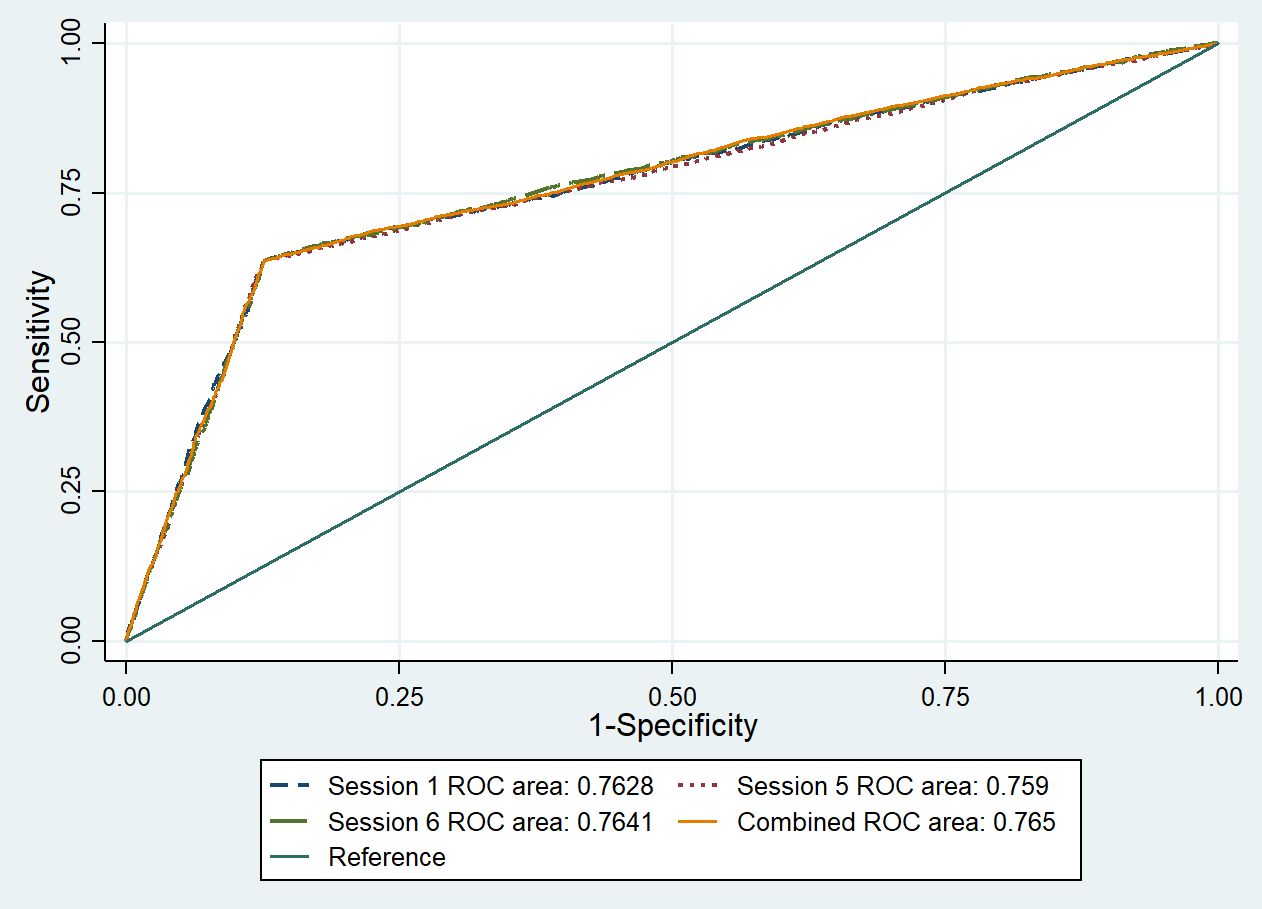

Supplement: Supplementary file 1 [file 9f1c4ca2daee57023206f499.docx]
